# Supplementary material for: B Cells Are Indispensable for a Novel Mouse Model of Primary Sjögren’s Syndrome
Source: PubMed Central journal article supplement (PMC5661054; doi:10.3389/fimmu.2017.01384), 2017-10-24
Supplement: image_1.pdf [file image_1.pdf]

## Supplementary information

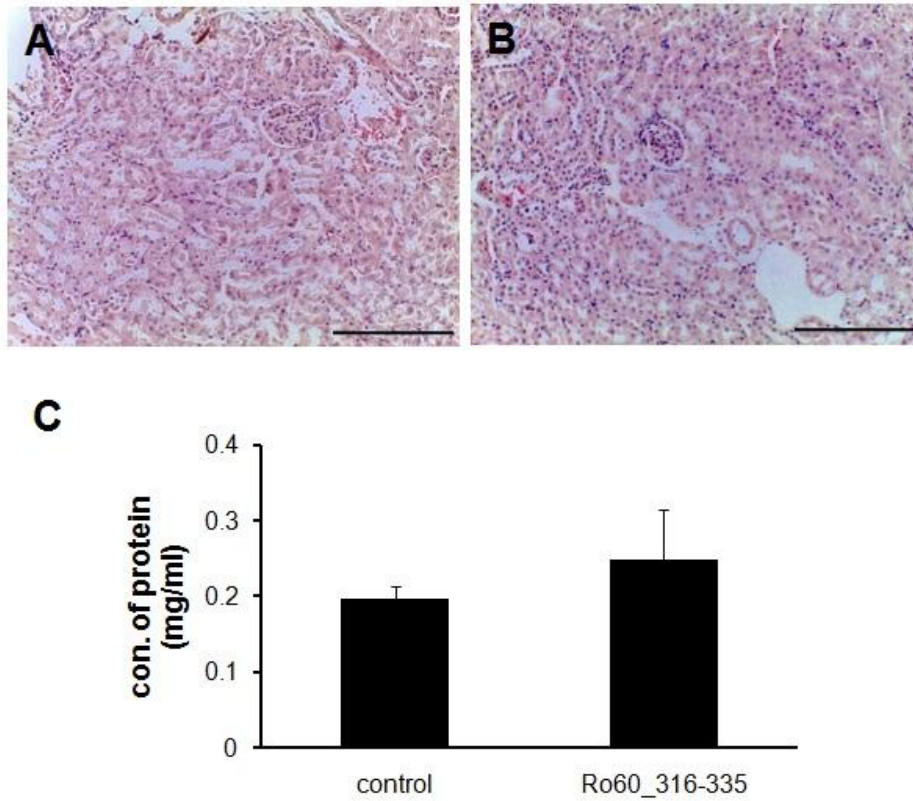

**Supplementary figure 1: No disease symptoms in kidneys of mRo60\_316-335 immunized C3H/He mice.** Representative slides of H&E staining for kidney from control (A) and mRo60\_316-335 immunized mice (B). Bars, 100  $\mu$ m. (C). Protein in the urine of control and mRo60\_316-335 immunized mice are not significantly different (Mann-Whitney U test). The concentration of protein in mouse urine was measured using Urine proteins test kit (Nanjing Jiancheng Bioengineering Institute, Nanjing, China) according to the provided protocol.

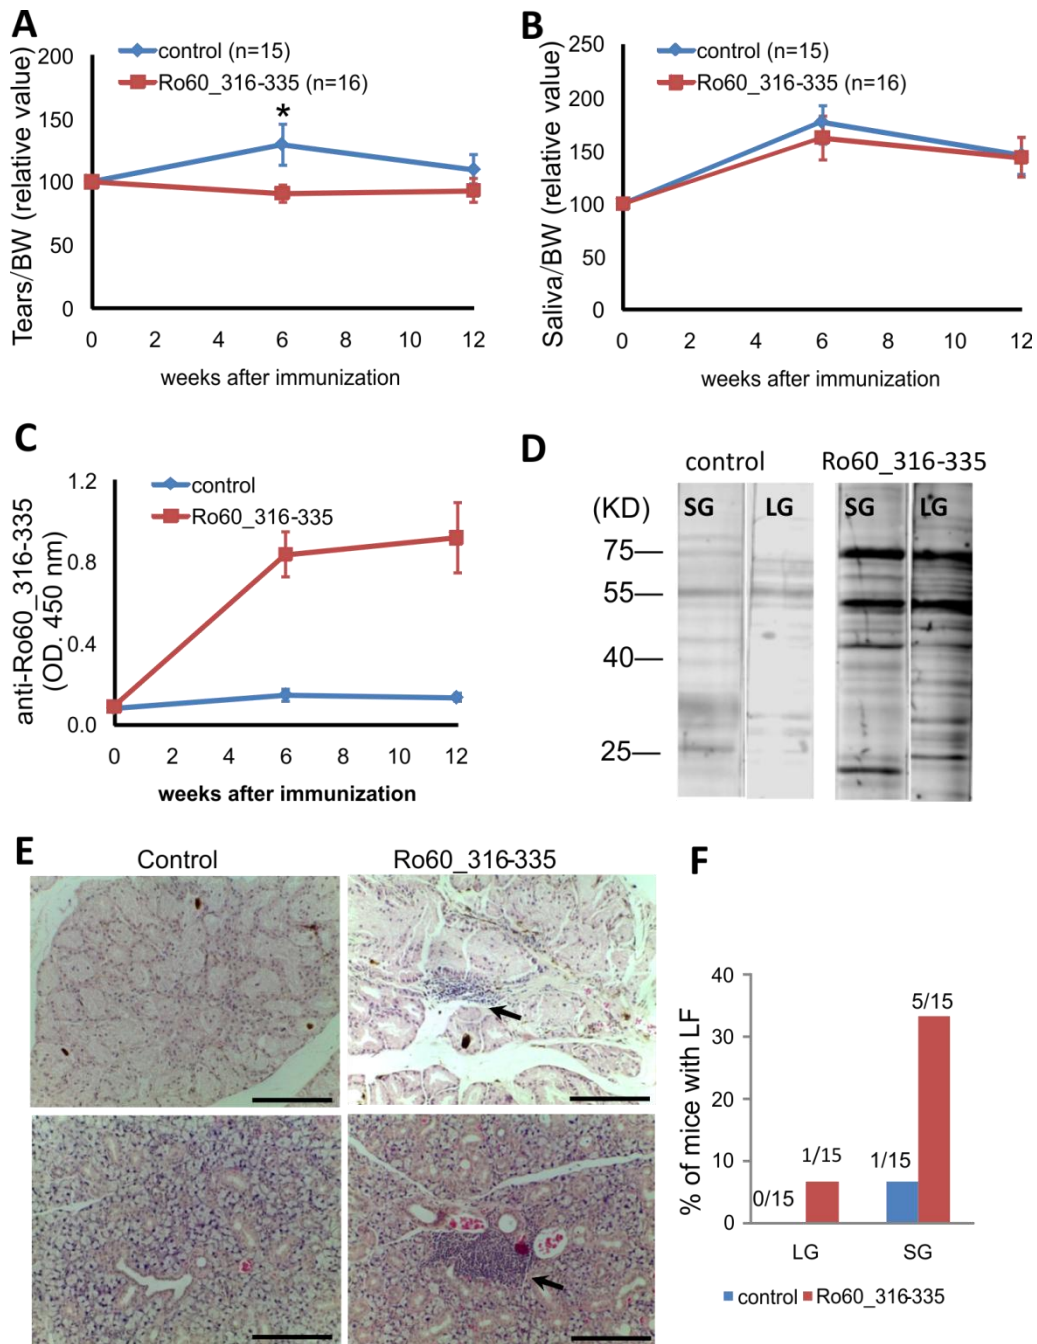

**Supplementary figure 2. C3H/HeN mice are susceptible to Ro60\_316-335 induced pSS-like disease.** Secretion of tears (A) and saliva (B) in Ro60\_316-335 peptide immunized mice (n=16) and PBS treated controls (n=15). Results two experiments were pooled and data are presented as mean  $\pm$  SEM. Statistically significant differences were calculated by using the unpaired Student's *t*-test with Welch's correction (\*  $p < 0.05$ ). (C). Autoantibodies against the Ro60\_316-335 peptide in sera of Ro60\_316-335 immunized (n=8) mice or controls (n=9). Results derived from one of two experiments performed are presented as mean  $\pm$  SEM. Statistical analyses were performed by the unpaired Student's *t*-test (\*\*\*)  $p < 0.001$ . (D). Immunoblotting of lacrimal glands (LG) or salivary glands (SG) tissue lysates from healthy

mice with sera from control or Ro60\_316-335 immunized mice. (E). Representative sections derived from lacrimal (upper panel) and salivary glands (lower panel) of Ro60\_315-336 immunized mice or controls after H&E staining. The black arrows indicate lymphocytic loci. Bars, 100  $\mu$ m. (F). Incidence of mice with lymphocytic foci in lacrimal and salivary glands. Numbers above bars indicate the ratio of number of mice with LF/total number of mice examined.

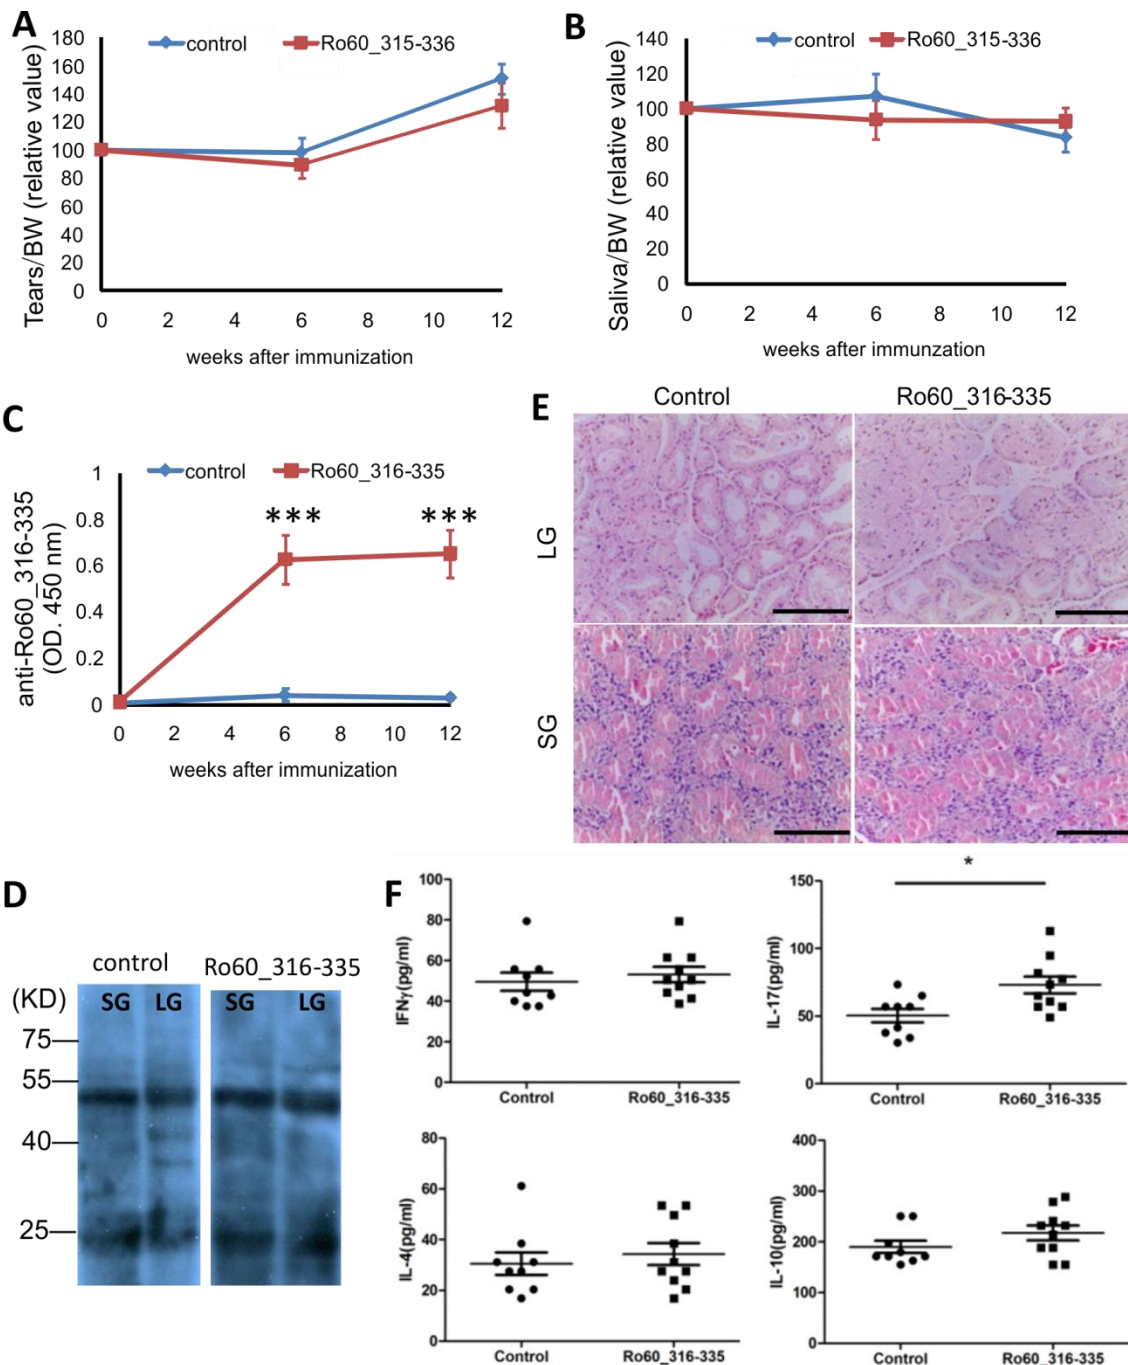

**Supplementary figure 3. DBA/1J mice are resistant to Ro60\_316-335 induced pSS-like disease.** Secretion of tears (A) and saliva (B) in Ro60\_316-335 peptide immunized mice (n=10) and PBS-treated controls (n=10). (C). Autoantibodies against the Ro60\_316-335 peptide in sera of Ro60\_316-335 immunized (n=10) mice or controls (n=10). Data are presented as mean  $\pm$  SEM. Statistical analyses were performed by using the unpaired Student's *t*-test with Welch's correction (\*\*\*)  $P < 0.001$  ). (D). Immunoblotting of lacrimal glands (LG) or salivary glands (SG) tissue lysates from healthy mice with sera from control or Ro60\_316-335 immunized mice. (E). Representative sections derived from lacrimal (upper panel) and salivary glands (lower panel) of Ro60\_315-336 immunized mice or controls after H&E staining (bar lengths = 100  $\mu$ m). (F). Levels of IFN- $\gamma$ , IL-17A, IL-4 and IL-10 in the sera of Ro60\_316-335 immunized mice (n=9) and controls (n=10). Data are presented as mean  $\pm$  SEM. Statistical analyses were performed by the unpaired Student's *t*-test ( $*p < 0.05$ ).

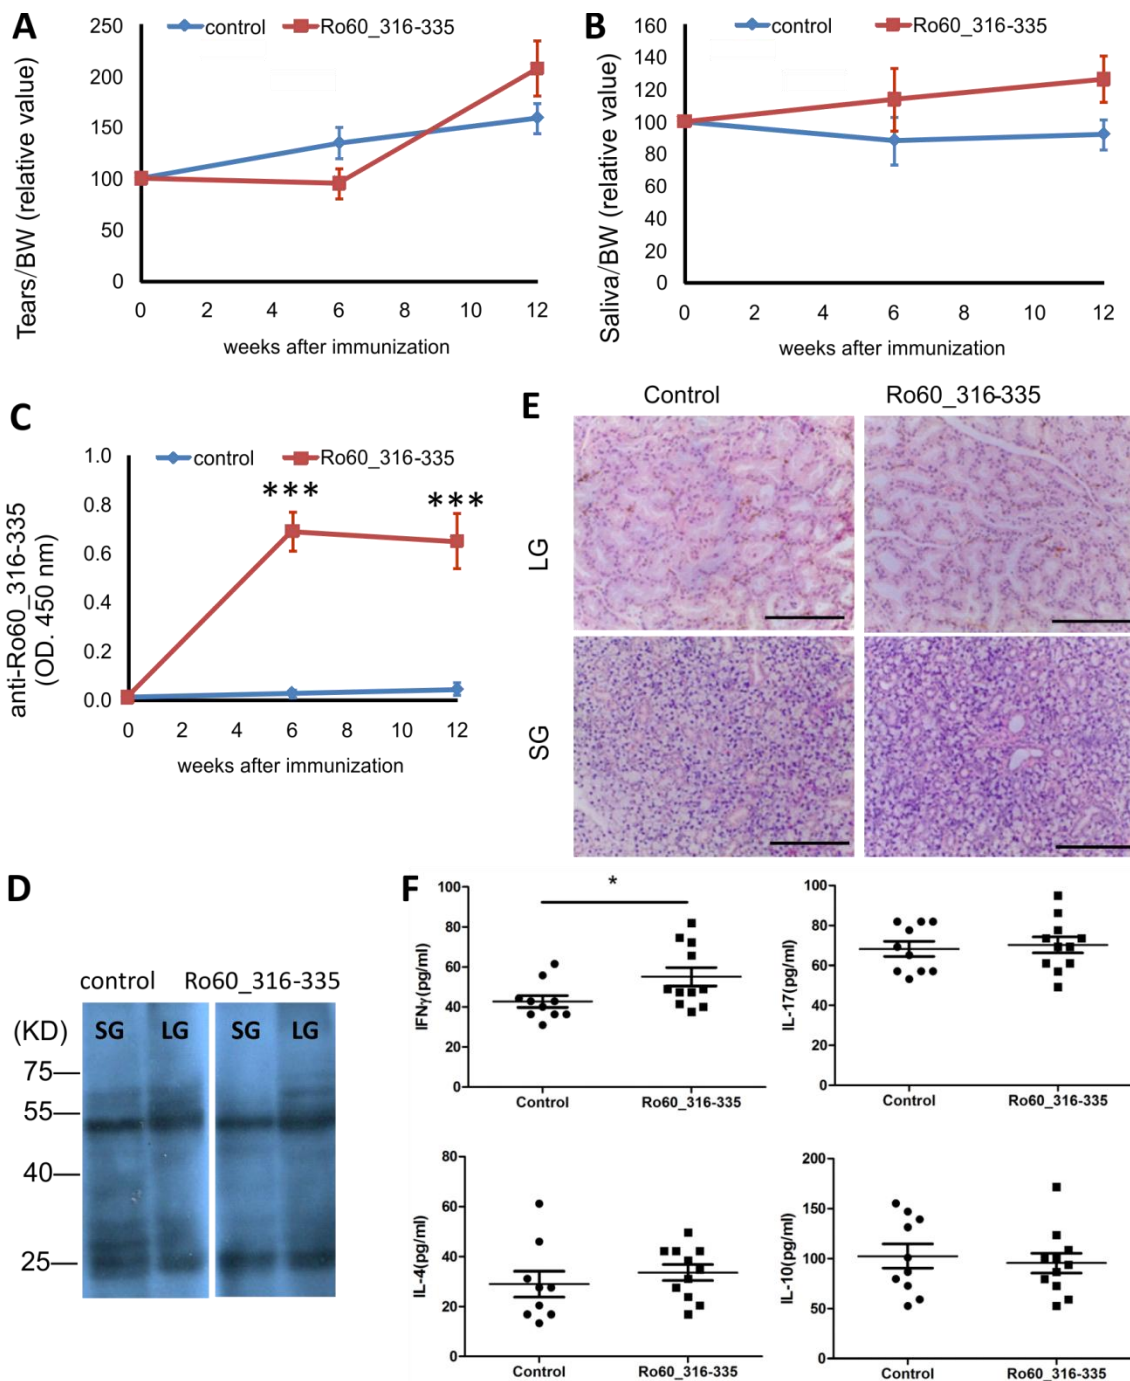

**Supplementary figure 4. C57BL/6J mice are resistant to Ro60\_316-335 induced pSS-like disease.** Secretion of tears (A) and saliva (B) in mice immunized with mRo60\_315-336 (n=14) or treated with PBS (n=12). Values were normalized to the respective body weights and subsequently to the levels of secretes determined before immunization. Data are presented as mean  $\pm$  SEM. C. Autoantibodies against the mRo60\_316-335 peptides in sera of mRo60\_316-335 immunized (n=11) mice or controls (n=11). Data are presented as mean  $\pm$  SEM. Statistical analyses were performed by using the unpaired Student's *t*-test with Welch's correction (\*\*\*)  $p < 0.001$ . (D). Immunoblotting of lacrimal glands (LG) or salivary glands (SG) tissue lysates from healthy mice with sera from control or mRo60\_316-335 immunized

mice. Representative results are shown. (E). Representative sections derived from lacrimal (upper panel) and salivary glands (lower panel) of Ro60\_315-336 immunized mice or controls after H&E staining (bar lengths = 100  $\mu\text{m}$ ). (F). Levels of IFN- $\gamma$ , IL-17A, IL-4 and IL-10 in the sera of Ro60\_316-335 immunized mice (n=9) and controls (n=12). Statistical analyses were performed by using the unpaired Student's *t*-test with Welch's correction (\* $p$ <0.05).
